# Supplementary material for: Flow cytometry allows rapid detection of protein aggregates in cellular and zebrafish models of spinocerebellar ataxia 3
Source: PubMed Central journal article supplement (PMC8524651; doi:10.1242/dmm.049023), 2021-10-11
Supplement: dmm-14-049023-s1.pdf [file dmm-14-049023-s1.pdf]

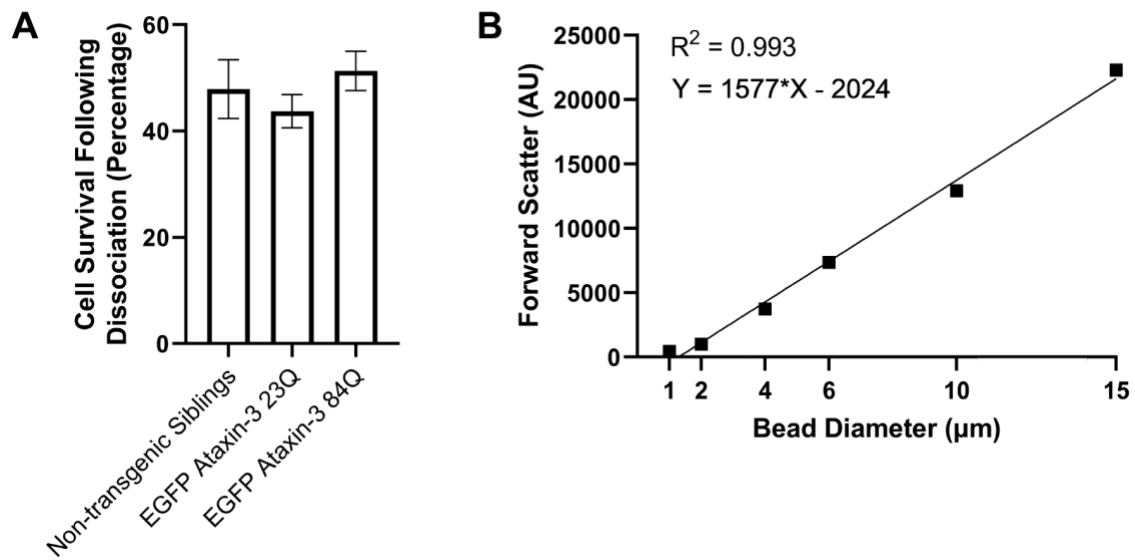

**Fig. S1.** (A) Staining of cells dissociated from 6 day-old zebrafish revealed greater than 40% of cells were stained with Hoechst live cell stain, suggesting greater than 40% survival post-dissociation. (B) Beads of a known micron diameter were used to calculate the relative size of insoluble GFP-positive particles using the displayed standard curve.

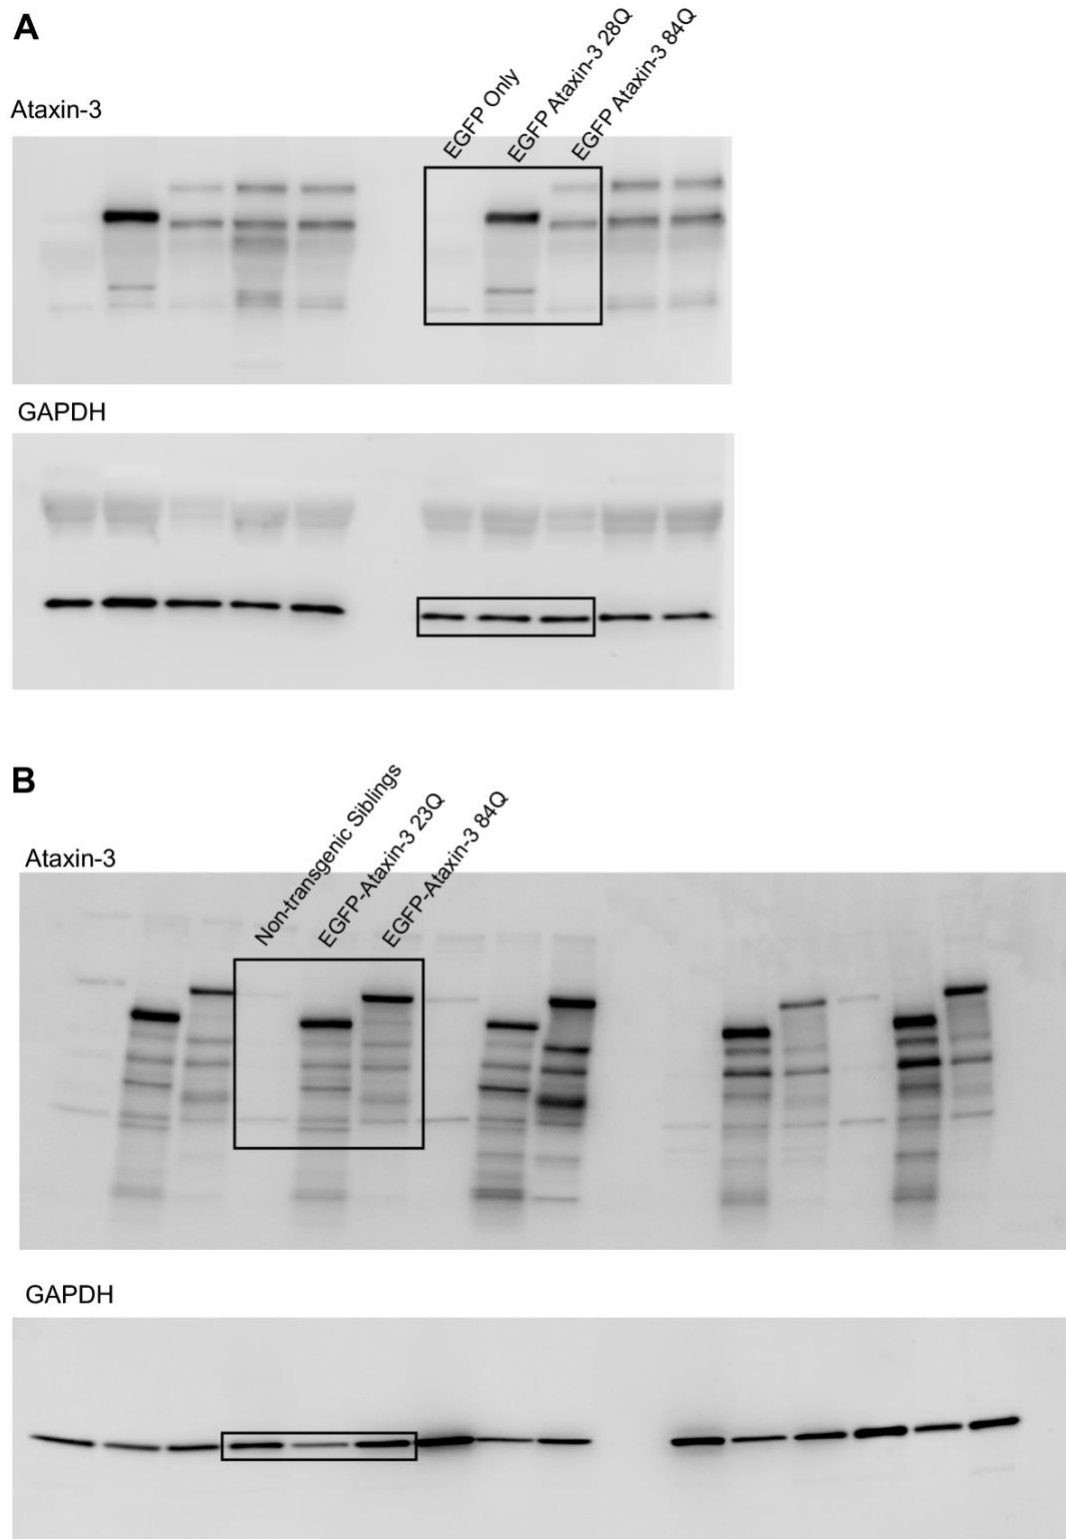

**Fig. S2.** (A) Uncropped immunoblot images from Figure 1. (B) Uncropped immunoblot images from Figure 4.
